# Supplementary material for: Plasma-assisted nitrogen fixation: the effect of water presence
Source: Royal Society of Chemistry journal article supplement (doi:10.1039/d2gc03063b), 2022-01-01
Supplement: d2gc03063b1.pdf [file d2gc03063b1.pdf]

## Plasma-assisted nitrogen fixation: the effect of water presence

Mikhail Gromov<sup>a,b,\*</sup> and Nefeli Kamarinopoulou<sup>c,d</sup>, Nathalie De Geyter<sup>b</sup>, Rino Morent<sup>b</sup>, Rony Snyders<sup>a,e</sup>, Dionisios Vlachos<sup>c,d</sup>, Panagiotis Dimitrakellis<sup>c,d</sup>, and Anton Nikiforov<sup>b</sup>

<sup>a</sup> *Chimie des Interactions Plasma-Surface (CHIPS), CIRMAP, Mons University, 7000-Mons, Belgium.*

<sup>b</sup> *Research Unit Plasma Technology (RUPT), Department of Applied Physics, Ghent University, 9000-Gent, Belgium.*

<sup>c</sup> *Department of Chemical and Biomolecular Engineering, University of Delaware, Newark, Delaware 19716, United States.*

<sup>d</sup> *Catalysis Center for Energy Innovation, University of Delaware, Newark, Delaware 19716, United States.*

<sup>e</sup> *Materia Nova Research Centre, Parc Initialis, 7000-Mons, Belgium.*

\* Author to whom correspondence should be addressed: [mikhail.gromov@ugent.be](mailto:mikhail.gromov@ugent.be)

### Equivalent electrical scheme and resistivity calculations

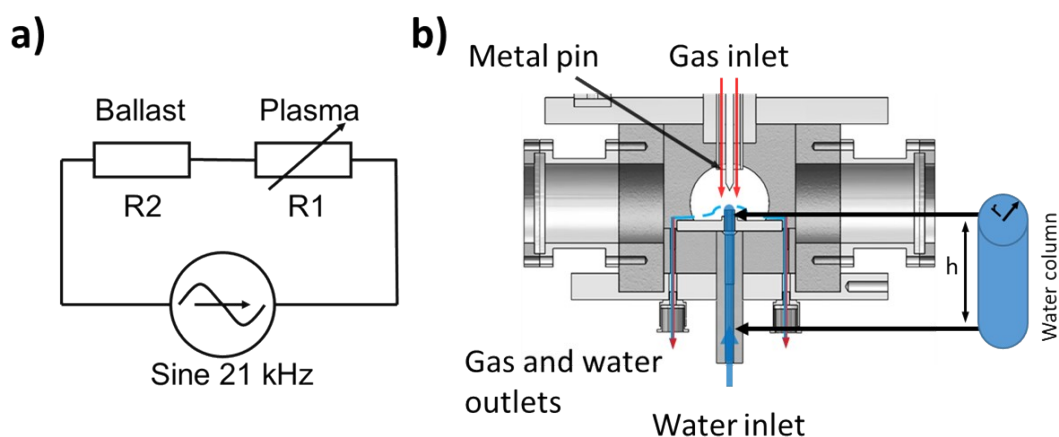

FIG. S1. (a) Equivalent scheme of the plasma systems; (b) pin-to-liquid system with denoting water column geometry used to calculate resistivity.

Figure S1a shows the equivalent electrical scheme of the plasma systems in pin-to-pin (PP) and pin-to-liquid (PL) configurations where  $R^1$  and  $R^2$  denote a variable resistivity of the discharge gap and a ballast that restricts the current, respectively. In the case of the PL discharge, the water column between the ground connection and the plasma/liquid interface shown in Figure S1b is considered as the ballast ( $R^2$ ) and was estimated as follows:

$$R_2^{PL} = \rho \cdot \frac{h}{\pi r^2}, \rho = \frac{1}{550 \cdot 10^{-6}} (\Omega \cdot \text{cm}); h = 1.1 \text{ (cm)}; r = 0.115 \text{ (cm)}$$

where  $\rho$  is the resistivity of the medium,  $h$  is the height of the water column, and  $r$  is the radius of the water channel. In the PP configuration, a 50 k $\Omega$  resistor ( $R^2$ ) was used to create two similar plasmas.

## Optical emission spectroscopy (OES)

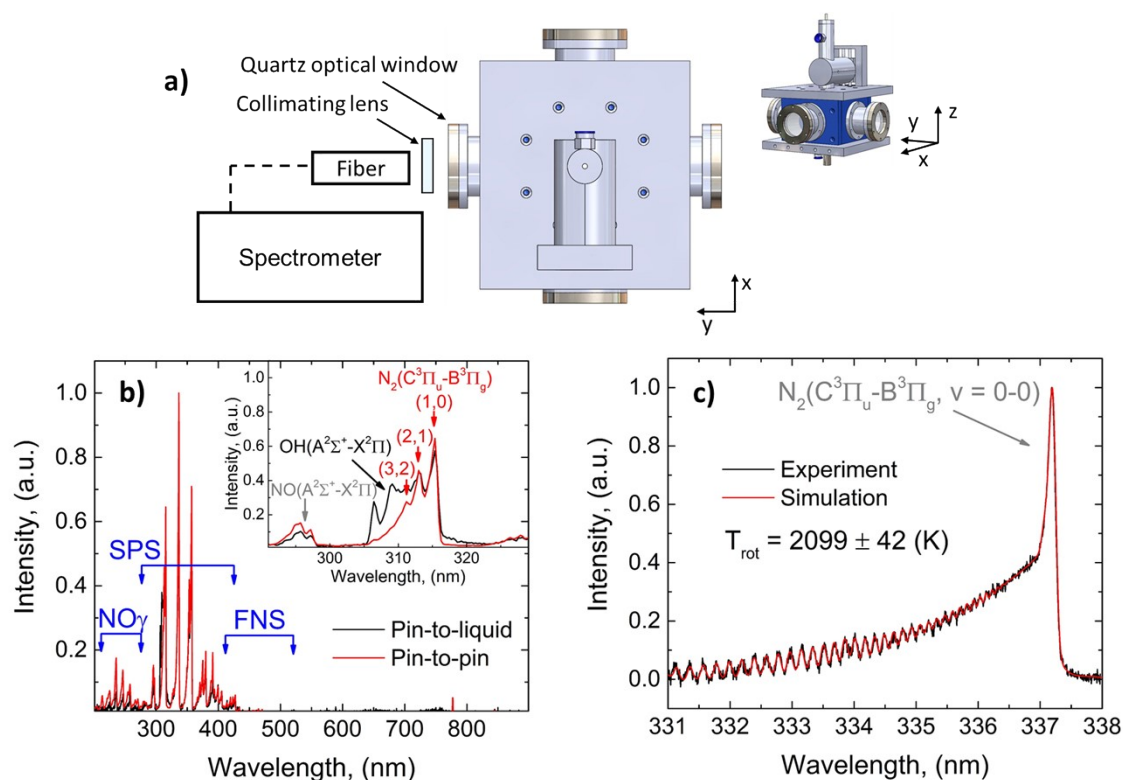

FIG. S2. (a) Schematic representation of the optical emission collection system. (b) Wide-range optical emission spectra taken at a power of 12 W measured using an Ocean Optics S2000 spectrometer (SPS – second positive system of  $\text{N}_2$ ; FNS – first negative system of  $\text{N}_2$ ). (c) An example of the fitted spectrum using massiveOES software in pin-to-pin setup configuration using a power of 4 W.

## Ion chromatography: analysis and calibration procedures

Nitrites ( $\text{NO}_2^-$ ) and nitrates ( $\text{NO}_3^-$ ) in the liquid phase were measured with a Metrohm 940 ProfIC Vario 14 ion chromatograph equipped with a Metrosep A Supp 5 column (4 x 100 mm), an MSMS-A Rotor suppressor, and a conductivity detector. The eluent was a solution of 3.2 mM  $\text{Na}_2\text{CO}_3$  and 1 mM  $\text{NaHCO}_3$  with a flow rate of 0.4 mL/min. The column conductivity was 3.71  $\mu\text{S}/\text{cm}$ . The temperature was set at 30°C and the pressure at 3.72 MPa. The calibration curves for  $\text{NO}_2^-$  and  $\text{NO}_3^-$  species were made with standard solutions of  $\text{NaNO}_2$  (Sigma Aldrich  $\geq 97\%$ ) and  $\text{NaNO}_3$  (Sigma Aldrich  $\geq 99\%$ ), respectively. The retention time for  $\text{NO}_2^-$  and  $\text{NO}_3^-$  species was  $\sim 8.1$  min and 11.1 min, respectively. To ensure accurate quantification of  $\text{NO}_2^-$  species, the calibration curves were obtained for low and high concentration ranges, as shown in Figures S2a and S2b.  $\text{NO}_3^-$  quantification was performed according to the calibration curve presented in Figure S2c.

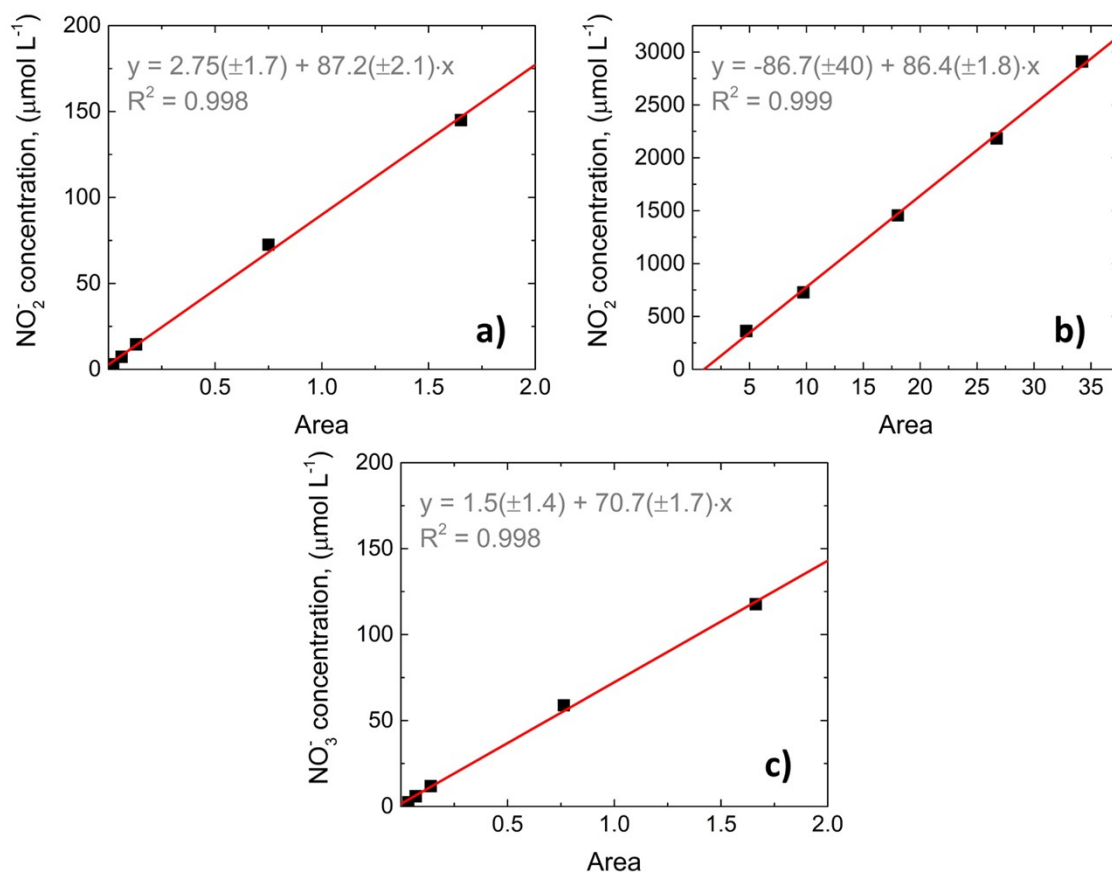

FIG. S3. Calibration curves for ion chromatography: (a)  $\text{NO}_2^-$  in the lower concentration range of  $2.9 \mu\text{M} \leq [\text{NO}_2^-] \leq 0.14 \text{ mM}$ , (b)  $\text{NO}_2^-$  in the higher concentration range of  $0.14 \text{ mM} < [\text{NO}_2^-] \leq 2.9 \text{ mM}$ , (c)  $\text{NO}_3^-$  in the concentration range of  $2.35 \mu\text{M} \leq [\text{NO}_3^-] \leq 0.12 \text{ mM}$ . The deviation interval of the measurements is  $< 1\%$ .

## Plasma visualization via a photomultiplier tube (PMT)

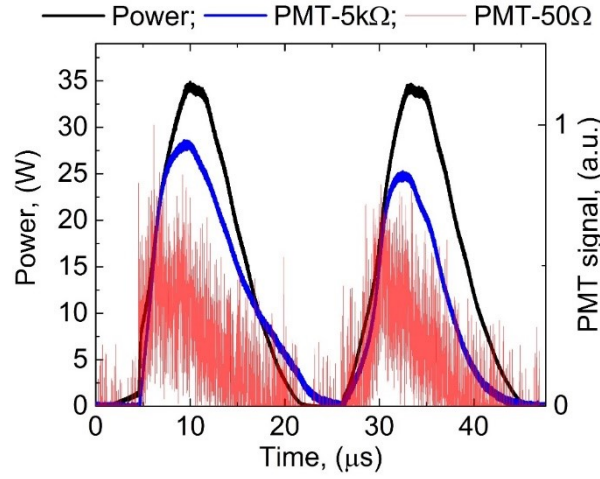

FIG. S4. Power waveform and PMT signals recorded with a time response of 5 ns (PMT-50Ω) and 500 ns (PMT-5kΩ).

## The plasma temperatures at different gas flow rates

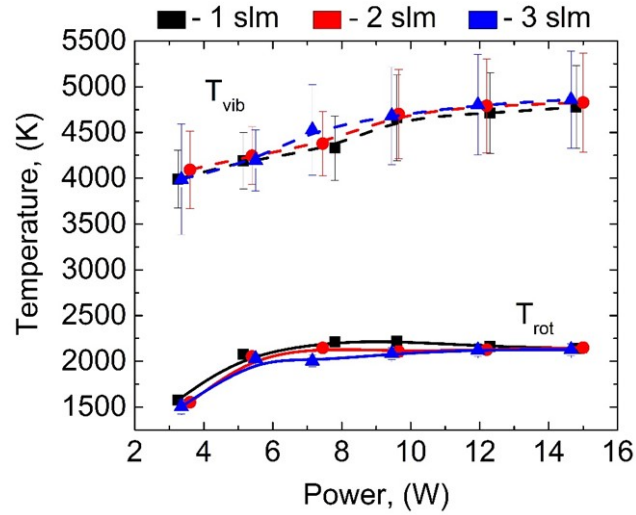

FIG. S5. Effect of the gas flow on the gas temperatures in the pin-to-pin system.

## The energy efficiency of the N-fixation process

The production energy efficiency ( $EE$ ) of component  $X$  in the gas phase was determined assuming linear behavior of the measured species with power as:

$$EE = \sum_X C_X \cdot 10^{-6} \cdot \frac{\text{flow rate}}{V_{\text{molar}}} \cdot M(X) \cdot \frac{1}{\text{Power}} \quad [g \cdot kWh^{-1}],$$

where  $C$  is the concentration of component  $X$  ( $NO$ ,  $NO_2$ ,  $N_2O$ ,  $HNO_2$ ) in  $ppm$ ,  $V_{\text{molar}}$  is the molar volume in  $l \cdot mol^{-1}$ , the gas flow is in  $l \cdot h^{-1}$ ,  $M$  is the molar mass of component  $X$  in  $g \cdot mol^{-1}$ , and the  $Power$  is expressed in  $kW$ .

The energy efficiency ( $EE$ ) of  $NO_x^-$  in the liquid phase was obtained as follows:

$$EE = \sum_x C_{NO_x^-} \cdot 10^{-6} \cdot \frac{V \cdot \rho_{H_2O}}{M_{H_2O}} \cdot M_{NO_x^-} \cdot \frac{1}{t \cdot Power} [g \cdot kWh^{-1}],$$

where  $C$  is the concentration of component  $NO_x^-$  ( $NO_2^-$ ,  $NO_3^-$ ) in the liquid in *ppm*,  $V$  is the volume of the liquid in *l*,  $\rho_{H_2O}$  is water density in  $g\ l^{-1}$ ,  $M$  is the molar mass in  $g\ mol^{-1}$ , and  $t$  is the treatment time in *h*.

The energy efficiencies averaged over the power range from 4 to 20 W are presented in FIG. 8. An example of an energy efficiency calculation is shown below for the PLb system using a gas flow rate of 1 slm. The rest of the experimental sets were used similarly to obtain the corresponding energy efficiencies.

Constants:

|                             |          |
|-----------------------------|----------|
| 1slm                        |          |
| Constants:                  |          |
| Gas flow rate, l/h          | 60       |
| Vmolar, l/mol               | 22.4     |
| M(NO), g/mol                | 30       |
| M(NO <sub>2</sub> ), g/mol  | 46       |
| M(NO <sub>3</sub> ), g/mol  | 62       |
| M(N <sub>2</sub> O), g/mol  | 44       |
| M(HNO <sub>2</sub> ), g/mol | 47       |
| Volume, l                   | 0.5      |
| Trin. Time, h               | 0.166667 |

Gas phase concentrations to EE:

| PLb      |         |        |      |        |
|----------|---------|--------|------|--------|
| power, W | NO      | NO2    | N2O  | HNO2   |
| W        | ppm     | ppm    | ppm  | ppm    |
| 4.00     | 325.39  | -12.55 | 4.41 | 16.39  |
| 4.84     | 363.91  | 21.68  | 4.48 | 36.71  |
| 5.68     | 402.43  | 55.91  | 4.55 | 57.03  |
| 6.53     | 440.96  | 90.14  | 4.62 | 77.35  |
| 7.37     | 479.48  | 124.37 | 4.69 | 97.67  |
| 8.21     | 518.00  | 158.60 | 4.76 | 118.00 |
| 9.05     | 556.53  | 192.83 | 4.84 | 138.32 |
| 9.89     | 595.05  | 227.06 | 4.91 | 158.64 |
| 10.74    | 633.58  | 261.29 | 4.98 | 178.96 |
| 11.58    | 672.10  | 295.52 | 5.05 | 199.28 |
| 12.42    | 710.62  | 329.75 | 5.12 | 219.60 |
| 13.26    | 749.15  | 363.98 | 5.20 | 239.92 |
| 14.11    | 787.67  | 398.21 | 5.27 | 260.24 |
| 14.95    | 826.20  | 432.44 | 5.34 | 280.56 |
| 15.79    | 864.72  | 466.67 | 5.41 | 300.88 |
| 16.63    | 903.24  | 500.90 | 5.48 | 321.20 |
| 17.47    | 941.77  | 535.13 | 5.56 | 341.52 |
| 18.32    | 980.29  | 569.36 | 5.63 | 361.84 |
| 19.16    | 1018.82 | 603.59 | 5.70 | 382.16 |
| 20.00    | 1057.34 | 637.82 | 5.77 | 402.48 |

| power, W | NO    | NO2                          | N2O   | HNO2  | NOX+HNC |
|----------|-------|------------------------------|-------|-------|---------|
| W        | g/kWh | g/kWh                        | g/kWh | g/kWh | g/kWh   |
| 4.00     | 6.54  | -0.39                        | 0.13  | 0.52  | 6.80    |
| 4.84     | 6.04  | 0.55                         | 0.11  | 0.95  | 7.65    |
| 5.68     | 5.69  | 1.21                         | 0.09  | 1.26  | 8.26    |
| 6.53     | 5.43  | 1.70                         | 0.08  | 1.49  | 8.71    |
| 7.37     | 5.23  | 2.08                         | 0.08  | 1.67  | 9.05    |
| 8.21     | 5.07  | 2.38                         | 0.07  | 1.81  | 9.33    |
| 9.05     | 4.94  | 2.62                         | 0.06  | 1.92  | 9.55    |
| 9.89     | 4.83  | 2.83                         | 0.06  | 2.02  | 9.74    |
| 10.74    | 4.74  | 3.00                         | 0.05  | 2.10  | 9.89    |
| 11.58    | 4.66  | 3.14                         | 0.05  | 2.17  | 10.03   |
| 12.42    | 4.60  | 3.27                         | 0.05  | 2.23  | 10.14   |
| 13.26    | 4.54  | 3.38                         | 0.05  | 2.28  | 10.24   |
| 14.11    | 4.49  | 3.48                         | 0.04  | 2.32  | 10.33   |
| 14.95    | 4.44  | 3.56                         | 0.04  | 2.36  | 10.41   |
| 15.79    | 4.40  | 3.64                         | 0.04  | 2.40  | 10.48   |
| 16.63    | 4.36  | 3.71                         | 0.04  | 2.43  | 10.55   |
| 17.47    | 4.33  | 3.77                         | 0.04  | 2.46  | 10.60   |
| 18.32    | 4.30  | 3.83                         | 0.04  | 2.49  | 10.65   |
| 19.16    | 4.27  | 3.88                         | 0.04  | 2.51  | 10.70   |
| 20.00    | 4.25  | 3.93                         | 0.03  | 2.53  | 10.75   |
|          |       |                              |       |       |         |
|          |       |                              |       |       |         |
|          |       | EE in the gas phase [g/kWh]: |       |       |         |
|          |       | AVERAGE AVEDEV               |       |       |         |
|          |       | 9.69 0.85                    |       |       |         |

Liquid phase concentrations to EE:

| Power<br>W | NO2-<br>ppm | NO3-<br>ppm |
|------------|-------------|-------------|
| 4.00       | 0.20        | 0.13        |
| 4.84       | 0.97        | 0.26        |
| 5.68       | 1.74        | 0.39        |
| 6.53       | 2.51        | 0.52        |
| 7.37       | 3.27        | 0.65        |
| 8.21       | 4.04        | 0.78        |
| 9.05       | 4.81        | 0.90        |
| 9.89       | 5.58        | 1.03        |
| 10.74      | 6.34        | 1.16        |
| 11.58      | 7.11        | 1.29        |
| 12.42      | 7.88        | 1.42        |
| 13.26      | 8.64        | 1.55        |
| 14.11      | 9.41        | 1.68        |
| 14.95      | 10.18       | 1.81        |
| 15.79      | 10.95       | 1.94        |
| 16.63      | 11.71       | 2.06        |
| 17.47      | 12.48       | 2.19        |
| 18.32      | 13.25       | 2.32        |
| 19.16      | 14.02       | 2.45        |
| 20.00      | 14.78       | 2.58        |

| Power<br>W                      | NO2-<br>g/kWh | NO3-<br>g/kWh |
|---------------------------------|---------------|---------------|
| 4.00                            | 0.39          | 0.34          |
| 4.84                            | 1.53          | 0.55          |
| 5.68                            | 2.34          | 0.71          |
| 6.53                            | 2.93          | 0.82          |
| 7.37                            | 3.40          | 0.90          |
| 8.21                            | 3.76          | 0.97          |
| 9.05                            | 4.06          | 1.03          |
| 9.89                            | 4.31          | 1.08          |
| 10.74                           | 4.52          | 1.12          |
| 11.58                           | 4.69          | 1.15          |
| 12.42                           | 4.85          | 1.18          |
| 13.26                           | 4.98          | 1.20          |
| 14.11                           | 5.10          | 1.23          |
| 14.95                           | 5.21          | 1.25          |
| 15.79                           | 5.30          | 1.26          |
| 16.63                           | 5.38          | 1.28          |
| 17.47                           | 5.46          | 1.29          |
| 18.32                           | 5.53          | 1.31          |
| 19.16                           | 5.59          | 1.32          |
| 20.00                           | 5.65          | 1.33          |
|                                 |               |               |
| EE in the liquid phase [g/kWh]: |               |               |
| AVERAGE AVEDEV                  |               |               |
|                                 | 5.30          | 1.35          |

Negative concentrations indicate that the formation processes at low plasma power differ and do not follow the linear trend.
